# Supplementary material for: Small Changes: Using Assessment to Direct Instructional Practices in Large-Enrollment Biochemistry Courses
Source: Atypon-hosted journal article supplement (doi:10.1187/cbe.16-06-0191), 2017-02-11

# Supplemental Material

*CBE—Life Sciences Education*

*Xu et al.*

Small changes: Using assessment to direct instructional practices in large-enrollment biochemistry courses

## Supplementary Documents

**Table 1s Percentage of students picking the ideas consistently across three items**

| Term             | Statement consistency %, three items | A    | B    | C   | D    | Not consistent |
|------------------|--------------------------------------|------|------|-----|------|----------------|
| Hydrogen Bonding |                                      |      |      |     |      |                |
| Fall 2014        | Pretest                              | 24.2 | 34.8 | 9.1 | 8.1  | 23.7           |
|                  | Posttest                             | 29.8 | 41.4 | 5.6 | 2.0  | 21.2           |
| Winter 2015      | Pretest                              | 22.0 | 31.2 | 7.9 | 9.2  | 29.7           |
|                  | Posttest                             | 70.6 | 6.8  | 1.8 | 2.6  | 18.1           |
| Spring 2015      | Pretest                              | 12.6 | 29.1 | 8.5 | 9.5  | 40.2           |
|                  | Posttest                             | 70.9 | 9.0  | 1.0 | 2.5  | 16.6           |
| Fall 2015        | Pretest                              | 16.7 | 31.0 | 6.4 | 6.1  | 39.8           |
|                  | Posttest                             | 59.7 | 16.2 | 2.2 | 1.7  | 20.1           |
| Bond Energy      |                                      |      |      |     |      |                |
| Fall 2014        | pretest                              | 28.3 | 0.5  | 0.0 | 24.7 | 46.5           |
|                  | posttest                             | 30.8 | 0.5  | 0.0 | 31.8 | 36.9           |
| Winter 2015      | pretest                              | 23.1 | 0.8  | 0.0 | 29.1 | 47.0           |
|                  | posttest                             | 59.8 | 0.3  | 0.0 | 12.6 | 27.3           |
| Spring 2015      | pretest                              | 17.1 | 1.0  | 0.5 | 25.6 | 55.8           |
|                  | posttest                             | 52.3 | 2.0  | 0.5 | 16.1 | 29.1           |
| Fall 2015        | pretest                              | 19.9 | 0.2  | 0.2 | 26.8 | 52.8           |
|                  | posttest                             | 50.1 | 0.2  | 0.0 | 16.7 | 32.9           |
| pK <sub>a</sub>  |                                      |      |      |     |      |                |
| Fall 2014        | pretest                              | 16.2 | 4.5  | 7.1 | -    | 73.2           |
|                  | posttest                             | 64.6 | 0.0  | 2.0 | -    | 33.3           |
| Winter 2015      | pretest                              | 17.6 | 1.0  | 4.7 | -    | 73.2           |
|                  | posttest                             | 69.3 | 0.0  | 1.6 | -    | 29.7           |
| Spring 2015      | pretest                              | 11.1 | 2.5  | 5.0 | -    | 77.4           |
|                  | posttest                             | 65.3 | 0.0  | 3.5 | -    | 31.7           |
| Fall 2015        | pretest                              | 13.3 | 1.2  | 6.4 | -    | 77.1           |
|                  | posttest                             | 60.0 | 0.0  | 1.5 | -    | 38.8           |

**The clicker question used in Fall 2014**

Urea is a water-soluble product of nitrogen metabolism. How many hydrogen bonds can one urea molecule donate to surrounding water molecules?

- A) 2
- B) 3
- C) 4
- D) 5
- E) 6

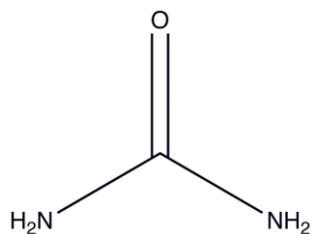

**Clicker questions added from Winter 2015**

Is this (the dotted line) a hydrogen bond?

- A. Yes
- B. No

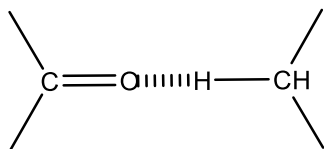

Is this (the dotted line) a hydrogen bond?

- A. Yes
- B. No

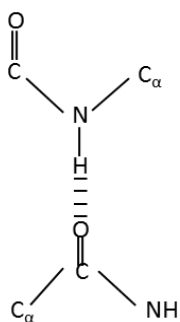

Supplement: combinedsupmats.pdf [file combinedsupmats.pdf]
